# Supplementary material
Source: PubMed Central journal article supplement (PMC3667751)
Supplement: NIHMS406560-supplement-Supp_Material_S1.pdf [file NIHMS406560-supplement-Supp_Material_S1.pdf]

# Condition Number Regularized Covariance Estimation

## Supplemental Materials

Joong-Ho Won *School of Industrial Management Engineering, Korea University, Seoul, Korea*

Johan Lim *Department of Statistics, Seoul National University, Seoul, Korea*

Seung-Jean Kim *Citi Capital Advisors, New York, NY, USA*

Bala Rajaratnam *Department of Statistics, Stanford University, Stanford, CA, USA*

### **Abstract**

This document contains additional proofs of Theorems 2 and 3, and Proposition 2; additional figures illustrating Bayesian prior densities; additional figure illustrating risk simulations; details of the empirical minimum variance rebalancing study.

## A Additional proofs

*Proof of Theorem 2.* Suppose the spectral decomposition of the  $k$ -th fold covariance matrix estimate  $\widehat{\Sigma}_\nu^{[-k]}$ , with  $\kappa_{\max} = \nu$ , is given by

$$\widehat{\Sigma}_\nu^{[-k]} = Q^{[-k]} \text{diag}(\widehat{\lambda}_1^{[-k]}, \dots, \widehat{\lambda}_p^{[-k]}) (Q^{[-k]})^T$$

with

$$\widehat{\lambda}_i^{[-k]} = \begin{cases} v^{[-k]*} & \text{if } l_i^{[-k]} < v^{[-k]*} \\ l_i^{[-k]} & \text{if } v^{[-k]*} \leq l_i^{[-k]} < \nu v^{[-k]*} \\ \nu v^{[-k]*} & \text{if } l_i^{[-k]} \geq \nu v^{[-k]*}, \end{cases}$$

where  $l_i^{[-k]}$  is the  $i$ -th largest eigenvalue of the  $k$ -th fold sample covariance matrix  $S^{[-k]}$ , and  $v^{[-k]*}$  is obtained by the method described in Section 2. Since  $\widehat{\Sigma}_\nu^{[-k]} = S^{[-k]}$  if  $\nu \geq l_1^{[-k]}/l_p^{[-k]} = \text{cond}(S^{[-k]})$ ,

$$\widehat{\kappa}_{\max} \leq \max_{k=1, \dots, K} \text{cond}(S^{[-k]}). \quad (27)$$

The right hand side of (27) converges in probability to the condition number  $\kappa$  of the true covariance matrix, as  $n$  increases while  $p$  is fixed. Hence,

$$\lim_{n \rightarrow \infty} P(\widehat{\kappa}_{\max} \leq \kappa) = 1.$$

We now show that

$$\lim_{n \rightarrow \infty} P(\widehat{\kappa}_{\max} \geq \kappa) = 1.$$

by showing that  $\widehat{\text{PR}}(\nu)$  is an asymptotically decreasing function in  $\nu$ .

Recall that

$$\widehat{\text{PR}}(\nu) = -\frac{1}{n} \sum_{k=1}^K l_k(\widehat{\Sigma}_\nu^{[-k]}, X_k),$$

where

$$l_k(\widehat{\Sigma}_\nu^{[-k]}, X_k) = -(n_k/2) \left[ \text{tr} \{ (\widehat{\Sigma}_\nu^{[-k]})^{-1} X_k X_k^T / n_k \} - \log \det (\widehat{\Sigma}_\nu^{[-k]})^{-1} \right],$$

which, by the definition of  $\widehat{\Sigma}_\nu^{[-k]}$ , is everywhere differentiable but at a finite number of points.

To see the asymptotic monotonicity of  $\widehat{\text{PR}}(\nu)$ , consider the derivative  $-\partial l_k(\widehat{\Sigma}_\nu^{[-k]}, X_k)/\partial \nu$ :

$$\begin{aligned}
-\frac{\partial l_k(\widehat{\Sigma}_\nu^{[-k]}, X_k)}{\partial \nu} &= \frac{n_k}{2} \left[ \mathbf{tr} \left( (\widehat{\Sigma}_\nu^{[-k]})^{-1} \frac{\partial \widehat{\Sigma}_\nu^{[-k]}}{\partial \nu} \right) + \mathbf{tr} \left\{ \frac{\partial (\widehat{\Sigma}_\nu^{[-k]})^{-1}}{\partial \nu} \left( X_k X_k^T / n_k \right) \right\} \right] \\
&= \frac{n_k}{2} \left[ \mathbf{tr} \left( (\widehat{\Sigma}_\nu^{[-k]})^{-1} \frac{\partial \widehat{\Sigma}_\nu^{[-k]}}{\partial \nu} \right) + \mathbf{tr} \left\{ \frac{\partial (\widehat{\Sigma}_\nu^{[-k]})^{-1}}{\partial \nu} \widehat{\Sigma}_\nu^{[-k]} \right\} \right. \\
&\quad \left. + \mathbf{tr} \left\{ \frac{\partial (\widehat{\Sigma}_\nu^{[-k]})^{-1}}{\partial \nu} \left( X_k X_k^T / n_k - \widehat{\Sigma}_\nu^{[-k]} \right) \right\} \right] \\
&= \frac{n_k}{2} \left[ \frac{\partial}{\partial \nu} \mathbf{tr} \left( (\widehat{\Sigma}_\nu^{[-k]})^{-1} \widehat{\Sigma}_\nu^{[-k]} \right) + \mathbf{tr} \left\{ \frac{\partial (\widehat{\Sigma}_\nu^{[-k]})^{-1}}{\partial \nu} \left( X_k X_k^T / n_k - \widehat{\Sigma}_\nu^{[-k]} \right) \right\} \right] \\
&= \frac{n_k}{2} \mathbf{tr} \left\{ \frac{\partial \widehat{\Sigma}_\nu^{-1}}{\partial \nu} \left( X_k X_k^T / n_k - \widehat{\Sigma}_\nu^{[-k]} \right) \right\}.
\end{aligned}$$

As  $n$  (hence  $n_k$ ) increases,  $\widehat{\Sigma}_\nu^{[-k]}$  converges almost surely to the inverse of the solution to the following optimization problem

$$\begin{aligned}
&\text{minimize} && \mathbf{tr}(\Omega \Sigma) - \log \det \Omega \\
&\text{subject to} && \text{cond}(\Omega) \leq \nu,
\end{aligned}$$

with  $\Sigma$  and  $\nu$  replacing  $S$  and  $\kappa_{\max}$  in (8). We denote the limit of  $\widehat{\Sigma}_\nu^{[-k]}$  by  $\tilde{\Sigma}_\nu$ . For the spectral decomposition of  $\Sigma$

$$\Sigma = R \text{diag}(\lambda_1, \dots, \lambda_p) R^T, \tag{28}$$

$\tilde{\Sigma}_\nu$  is given as

$$\tilde{\Sigma}_\nu = R \text{diag}(\psi_1(\nu), \dots, \psi_p(\nu)) R^T, \tag{29}$$

where, for some  $\tau(\nu) > 0$ ,

$$\psi_i(\nu) = \begin{cases} \tau(\nu) & \text{if } \lambda_i \leq \tau(\nu) \\ \lambda_i & \text{if } \tau(\nu) < \lambda_i \leq \nu\tau(\nu) \\ \nu\tau(\nu), & \text{if } \nu\tau(\nu) < \lambda_i. \end{cases}$$

Recall from Proposition 1 that  $\tau(\nu)$  is decreasing in  $\nu$  and  $\nu\tau(\nu)$  is increasing.

Let  $c_k$  be the limit of  $n_k/(2n)$  when both  $n$  and  $n_k$  increases. Then,  $X_k X_k^T / n_k$  converges almost surely to  $\Sigma$ . Thus,

$$-\frac{1}{n} \frac{\partial l_k(\widehat{\Sigma}_\nu^{[-k]}, X_k)}{\partial \nu} \rightarrow c_k \mathbf{tr} \left\{ \frac{\partial \tilde{\Sigma}_\nu^{-1}}{\partial \nu} (\Sigma - \tilde{\Sigma}_\nu) \right\}, \quad \text{almost surely.} \tag{30}$$

If  $\nu \geq \kappa$ , then  $\tilde{\Sigma}_\nu = \Sigma$ , and the RHS of (30) degenerates to 0. Now consider the case that  $\nu < \kappa$ . From (29),

$$\frac{\partial \tilde{\Sigma}_\nu^{-1}}{\partial \nu} = R \frac{\partial \Psi^{-1}}{\partial \nu} R^T = R \text{diag} \left( \frac{\partial \psi_1^{-1}}{\partial \nu}, \dots, \frac{\partial \psi_p^{-1}}{\partial \nu} \right) R^T,$$

where

$$\frac{\partial \psi_i^{-1}}{\partial \nu} = \begin{cases} -\frac{1}{\tau(\nu)^2} \frac{\partial \tau(\nu)}{\partial \nu} & (\geq 0) & \text{if } \lambda_i \leq \tau(\nu) \\ 0 & & \text{if } \tau(\nu) < \lambda_i \leq \nu\tau(\nu) \\ -\frac{1}{\nu^2 \tau(\nu)^2} \frac{\partial(\nu\tau(\nu))}{\partial \nu} & (\leq 0) & \text{if } \nu\tau(\nu) < \lambda_i. \end{cases}$$

From (28) and (29),

$$\Sigma - \tilde{\Sigma}_\nu = R \text{diag}(\lambda_1 - \psi_1, \dots, \lambda_p - \psi_p) R^T,$$

where

$$\lambda_i - \psi_i = \begin{cases} \lambda_i - \tau(\nu) & (\leq 0) & \text{if } \lambda_i \leq \tau(\nu) \\ 0 & & \text{if } \lambda_i \leq \nu\tau(\nu) \\ \lambda_i - \nu\tau(\nu) & (\geq 0) & \text{if } \nu\tau(\nu) < \lambda_i. \end{cases}$$

Therefore,

$$\text{tr} \left\{ \frac{\partial \tilde{\Sigma}_\nu^{-1}}{\partial \nu} (\Sigma - \tilde{\Sigma}_\nu) \right\} = \sum_i \frac{\partial \psi_i^{-1}}{\partial \nu} \cdot (\lambda_i - \psi_i) \leq 0.$$

In other words, the RHS of (30) is less than 0 and the almost sure limit of  $\widehat{\text{PR}}(\nu)$  is decreasing in  $\nu$ .

By definition,  $\widehat{\text{PR}}(\hat{\kappa}_{\max}) \leq \widehat{\text{PR}}(\kappa)$ . From this and the asymptotic monotonicity of  $\widehat{\text{PR}}(\nu)$ , we conclude that

$$\lim_{n \rightarrow \infty} \mathbf{pr}(\hat{\kappa}_{\max} \geq \kappa) = 1.$$

□

*Proof of Proposition 2.* We are given that

$$\pi(\lambda_1, \dots, \lambda_p) = \exp\left(-g_{\max} \frac{\lambda_1}{\lambda_p}\right) \quad \lambda_1 \geq \dots \geq \lambda_p > 0.$$

Now

$$\int_C \pi(\lambda_1, \dots, \lambda_p) d\lambda = \int_C \exp\left(-g_{\max} \frac{\lambda_1}{\lambda_p}\right) d\lambda,$$

where  $C = \{\lambda_1 \geq \dots \geq \lambda_p > 0\}$ .

Let us now make the following change of variables:  $x_i = \lambda_i - \lambda_{i+1}$  for  $i = 1, 2, \dots, p-1$ , and  $x_p = \lambda_p$ . The inverse transformation yields  $\lambda_i = \sum_{j=i}^p x_j$  for  $i = 1, 2, \dots, p$ . It is straightforward to verify that the Jacobian of this transformation is given by  $|J| = 1$ .

Now we can therefore rewrite the integral above as

$$\begin{aligned}
\int_C \exp\left(-g_{\max} \frac{\lambda_1}{\lambda_p}\right) d\lambda &= \int_{\mathbb{R}_1^p} \exp\left(-g_{\max} \frac{x_1 + \dots + x_p}{x_p}\right) dx_1 \dots dx_p \\
&= e^{-g_{\max}} \int \left[ \prod_{i=1}^{p-1} \int \exp\left(-g_{\max} \frac{x_i}{x_p}\right) dx_i \right] dx_p \\
&= e^{-g_{\max}} \int_0^\infty \left(\frac{x_p}{g_{\max}}\right)^{p-1} dx_p \\
&= \frac{e^{-g_{\max}}}{g_{\max}^{p-1}} \int_0^\infty x_p^{p-1} dx_p \\
&= \infty.
\end{aligned}$$

To prove that the posterior yields a proper distribution we proceed as follows:

$$\begin{aligned}
&\int_C \pi(\underline{\lambda}) f(\underline{\lambda}, \underline{l}) d\underline{\lambda} \\
&\propto \int_C \exp\left(-\frac{n}{2} \sum_{i=1}^p \frac{l_i}{\lambda_i}\right) \left(\prod_{i=1}^p \lambda_i\right)^{-\frac{n}{2}} \exp\left(-g_{\max} \frac{\lambda_1}{\lambda_p}\right) d\underline{\lambda} \\
&\leq \int_C \exp\left(-\frac{n}{2} \sum_{i=1}^p \frac{l_p}{\lambda_i}\right) \left(\prod_{i=1}^p \lambda_i\right)^{-\frac{n}{2}} \exp\left(-g_{\max} \frac{\lambda_1}{\lambda_p}\right) d\underline{\lambda} \text{ as } l_p \leq l_i \ \forall i = 1, \dots, p \\
&\leq \int_C \exp\left(-\frac{n}{2} \sum_{i=1}^p \frac{l_p}{\lambda_i}\right) \left(\prod_{i=1}^p \lambda_i\right)^{-\frac{n}{2}} e^{-g_{\max}} d\underline{\lambda} \text{ as } \frac{\lambda_1}{\lambda_p} \geq 1 \\
&\leq e^{-g_{\max}} \prod_{i=1}^p \left(\int_0^\infty \exp\left(-\frac{n}{2} \frac{l_p}{\lambda_i}\right) \lambda_i^{-\frac{n}{2}} d\lambda_i\right).
\end{aligned}$$

The above integrand is the density of the inverse gamma distribution and therefore the corresponding integral above has a finite normalizing constant and thus yielding a proper posterior.  $\square$

*Proof of Theorem 3.* (i) The conditional risk of  $\tilde{\Sigma}(\kappa_{\max}, \omega)$ , given the sample eigenvalues  $\underline{l} = (l_1, \dots, l_p)$ , is

$$\mathbf{E} \left( \mathcal{L}_{\text{ent}}(\tilde{\Sigma}(\kappa_{\max}, \omega), \Sigma) | \underline{l} \right) = \sum_{i=1}^p \left\{ \tilde{\lambda}_i \mathbf{E} (a_{ii}(Q) | \underline{l}) - \log \tilde{\lambda}_i \right\} + \log \det \Sigma - p,$$

where  $a_{ii}(Q) = \sum_{j=1}^p q_{ji}^2 \lambda_j^{-1}$  and  $q_{ji}$  is the  $(j, i)$ -th element of the orthogonal matrix  $Q$ . This is because

$$\begin{aligned}
\mathcal{L}_{\text{ent}}(\tilde{\Sigma}(\kappa_{\max}, \omega), \Sigma) &= \mathbf{tr}(\tilde{\Lambda}A(Q)) - \log \det \tilde{\Lambda} + \log \det \Sigma - p \\
&= \sum_{i=1}^p \left\{ \tilde{\lambda}_i a_{ii}(Q) - \log \tilde{\lambda}_i \right\} + \log \det \Sigma - p,
\end{aligned} \tag{31}$$

where  $A(Q) = Q^T \Sigma^{-1} Q$ .

In (31), the summand has the form

$$x \mathbf{E} (a_{ii}(Q) | \underline{l}) - \log x$$

whose minimum is achieved at  $x = 1/\mathbf{E} (a_{ii}(Q) | \underline{l})$ . Since  $\sum_{j=1}^p q_{ji}^2 = 1$  and  $\Sigma^{-1} \in \mathcal{D}(\kappa_{\max}, 1/(\kappa_{\max}\omega))$  if and only if  $\Sigma \in \mathcal{D}(\kappa_{\max}, \omega)$ , we have  $1/(\kappa_{\max}\omega) \leq a_{ii}(Q) \leq 1/\omega$ . Hence  $1/\mathbf{E} (a_{ii}(Q) | \underline{l})$  lies between  $\omega$  and  $\kappa_{\max}\omega$  almost surely. Therefore,

1. If  $l_i \leq \omega$ , then  $\tilde{\lambda}_i = \omega$  and

$$\tilde{\lambda}_i \mathbf{E} (a_{ii}(Q) | \underline{l}) - \log \tilde{\lambda}_i \leq l_i \mathbf{E} (a_{ii}(Q) | \underline{l}) - \log l_i.$$

2. If  $\omega \leq l_i < \kappa_{\max}\omega$ , then  $\tilde{\lambda}_i = l_i$  and

$$\tilde{\lambda}_i \mathbf{E} (a_{ii}(Q) | \underline{l}) - \log \tilde{\lambda}_i = l_i \mathbf{E} (a_{ii}(Q) | \underline{l}) - \log l_i.$$

3. If  $l_i \geq \kappa_{\max}\omega$ , then  $\tilde{\lambda}_i = \kappa_{\max}\omega$  and

$$\tilde{\lambda}_i \mathbf{E} (a_{ii}(Q) | \underline{l}) - \log \tilde{\lambda}_i \leq l_i \mathbf{E} (a_{ii}(Q) | \underline{l}) - \log l_i.$$

Thus,

$$\sum_{i=1}^p \left\{ \tilde{\lambda}_i \mathbf{E} (a_{ii}(Q) | \underline{l}) - \log \tilde{\lambda}_i \right\} \leq \sum_{i=1}^p \left\{ l_i \mathbf{E} (a_{ii}(Q) | \underline{l}) - \log l_i \right\}$$

and the risk with respect to the entropy loss is

$$\begin{aligned} \mathcal{R}_{\text{ent}}(\tilde{\Sigma}(\kappa_{\max}, \omega)) &= \mathbf{E} \left[ \sum_{i=1}^p \left\{ \tilde{\lambda}_i \mathbf{E} (a_{ii}(Q) | \underline{l}) - \log \tilde{\lambda}_i \right\} \right] \\ &\leq \mathbf{E} \left[ \sum_{i=1}^p \left\{ l_i \mathbf{E} (a_{ii}(Q) | \underline{l}) - \log l_i \right\} \right] \\ &= \mathcal{R}_{\text{ent}}(S). \end{aligned}$$

In other words,  $\tilde{\Sigma}(\kappa_{\max}, \omega)$  has a smaller risk than  $S$ , provided  $\underline{\lambda}^{-1} \in \mathcal{D}(\kappa_{\max}, \omega)$ .

(ii) Suppose the true covariance matrix  $\Sigma$  has the spectral decomposition  $\Sigma = R\Lambda R^T$  with  $R$  orthogonal and  $\Lambda = \text{diag}(\lambda_1, \dots, \lambda_p)$ . Let  $A = R\Lambda^{1/2}$ , then  $S_0 \triangleq A^T S A$  has the same distribution as the sample covariance matrix observed from a  $p$ -variate Gaussian distribution with the identity covariance matrix. From the variational definition of the largest eigenvalue  $l_1$  of  $S$ , we obtain

$$l_1 = \max_{v \neq 0} \frac{v^T S v}{v^T v} = \max_{w \neq 0} \frac{w^T S_0 w}{w^T \Lambda^{-1} w},$$

where  $w = A^T v$ . Furthermore, since for any  $w \neq 0$ ,

$$\lambda_1^{-1} = \min_{w \neq 0} \frac{w^T \Lambda^{-1} w}{w^T w} \leq \frac{w^T \Lambda^{-1} w}{w^T w},$$

we have

$$l_1 \leq \lambda_1 \max_{w \neq 0} \frac{w^T S_0 w}{w^T w} = \lambda_1 e_1, \quad (32)$$

where  $e_1$  is the largest eigenvalue of  $S_0$ . Using essentially the same argument, we can show that

$$l_p \geq \lambda_p e_p, \quad (33)$$

where  $e_p$  is the smallest eigenvalue of  $S_0$ . Then, from the results by Geman (1980) and Silverstein (1985), we see that

$$\mathbf{pr} \left( \left\{ e_1 \leq (1 + \sqrt{\gamma})^2, e_p \geq (1 - \sqrt{\gamma})^2 \right\} \text{ eventually} \right) = 1. \quad (34)$$

The combination of (32)–(34) leads to

$$\mathbf{pr} \left( \left\{ l_1 \leq \lambda_1 (1 + \sqrt{\gamma})^2, l_p \geq \lambda_p (1 - \sqrt{\gamma})^2 \right\} \text{ eventually} \right) = 1.$$

On the other hand, if  $\kappa_{\max} \geq \kappa (1 - \sqrt{\gamma})^{-2}$ , then

$$\left\{ l_1 \leq \lambda_1 (1 + \sqrt{\gamma})^2, l_p \geq \lambda_p (1 - \sqrt{\gamma})^2 \right\} \subset \left\{ \max \left( \frac{l_1}{\lambda_p}, \frac{\lambda_1}{l_p} \right) \leq \kappa_{\max} \right\}.$$

Also, if  $\max(l_1/\lambda_p, \lambda_1/l_p) \leq \kappa_{\max}$ , then

$$\lambda_1/\kappa_{\max} \leq l_p \leq l_1/\kappa_{\max} \leq \lambda_p.$$

From (12),  $\tau^*$  lies between  $l_p$  and  $l_1/\kappa_{\max}$ . Therefore,

$$\tau^* \leq \lambda_p \quad \text{and} \quad \lambda_1 \leq \kappa_{\max} \tau^*.$$

In other words

$$\left\{ \max \left( \frac{l_1}{\lambda_p}, \frac{\lambda_1}{l_p} \right) \leq \kappa_{\max} \right\} \subset \left\{ \Sigma \in \mathcal{D}(\kappa_{\max}, u^*) \right\},$$

which concludes the proof. □

## B Comparison of Bayesian prior densities

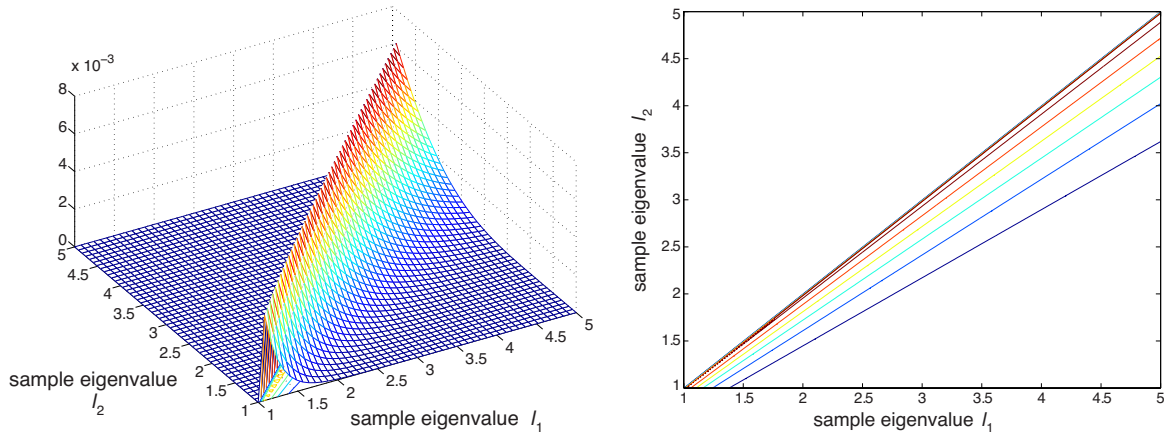

(a)

(b)

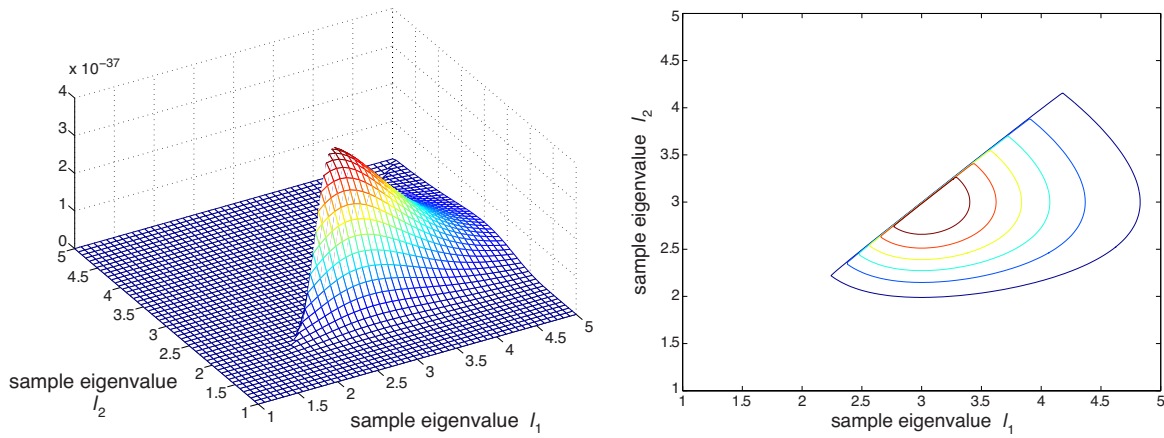

(c)

(d)

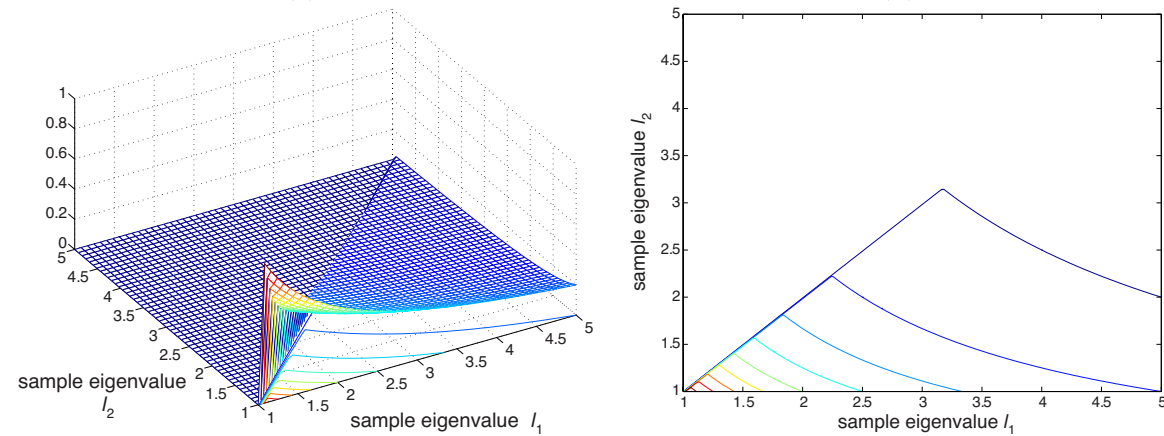

(e)

(f)

Comparison of various prior densities for eigenvalue shrinkage ( $p = 2$ ). (a), (c), (e): Three-dimensional views. (b), (d), (f): contour views. (a), (b): prior for regularization (19). (c), (d): inverse Wishart prior. (e), (f): reference prior due to Yang and Berger (1994).



# C Risk simulation results ( $\rho = 0.5$ )

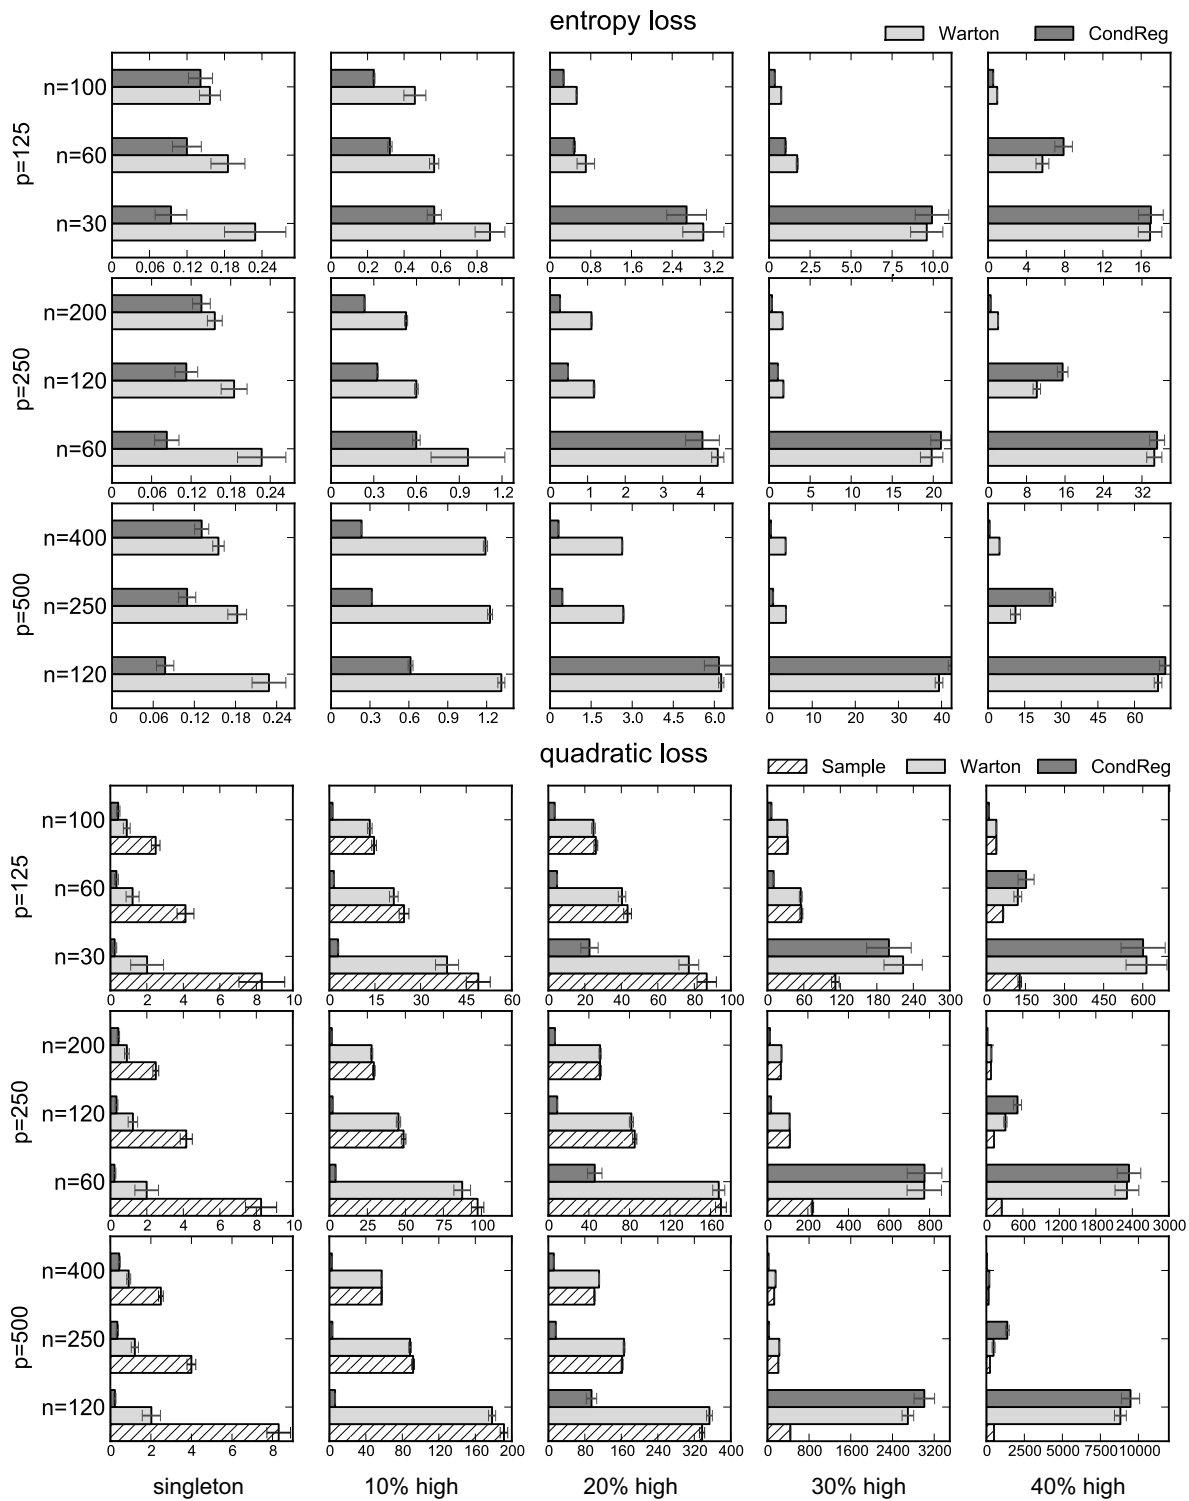

Average risks (with error bars) over 1000 runs with respect to two loss functions  $\rho = 0.5$ . `sample`=sample

covariance matrix,  $\text{Warton}$ =linear shrinkage (Warton, 2008),  $\text{CondReg}$ =condition number regularization. Risks are normalized by the dimension ( $p$ ).

## D Empirical minimum variance rebalancing study (Section 6.2)

### D.1 List of the Dow Jones constituents

The Dow Jones stocks used in our numerical study and their market performance over the period from February 18, 1994 to June 6, 2008. The return, risk and the Sharpe ratio (SR) are annualized.

| index | company                               | ticker | return [%] | risk [%] | SR    |
|-------|---------------------------------------|--------|------------|----------|-------|
| 1     | 3M Company                            | MMM    | 12.04      | 10.74    | 0.25  |
| 2     | Alcoa, Inc.                           | AA     | 16.50      | 15.47    | 0.30  |
| 3     | American Express                      | AXP    | 17.52      | 14.61    | 0.35  |
| 4     | American International Group, Inc.    | AIG    | 7.96       | 12.93    | 0.07  |
| 5     | AT&T Inc.                             | T      | 11.57      | 12.95    | 0.19  |
| 6     | Bank of America                       | BAC    | 11.57      | 13.14    | 0.19  |
| 7     | The Boeing Company                    | BA     | 13.03      | 13.81    | 0.23  |
| 8     | Caterpillar Inc.                      | CAT    | 18.53      | 14.26    | 0.39  |
| 9     | Chevron Corporation                   | CVX    | 15.86      | 10.53    | 0.42  |
| 10    | Citigroup Inc.                        | C      | 14.44      | 15.27    | 0.25  |
| 11    | The Coca-Cola Company                 | KO     | 10.74      | 10.77    | 0.20  |
| 12    | E.I. du Pont de Nemours & Company     | DD     | 9.58       | 12.43    | 0.13  |
| 13    | Exxon Mobil Corporation               | XOM    | 16.58      | 10.46    | 0.45  |
| 14    | General Electric Company              | GE     | 13.47      | 12.04    | 0.28  |
| 15    | General Motors Corporation            | GM     | -1.24      | 15.85    | -0.20 |
| 16    | The Hewlett-Packard Company           | HPQ    | 20.22      | 18.24    | 0.35  |
| 17    | The Home Depot                        | HD     | 12.96      | 15.28    | 0.20  |
| 18    | Intel Corporation                     | INTC   | 20.84      | 19.13    | 0.35  |
| 19    | International Business Machines Corp. | IBM    | 20.99      | 13.86    | 0.48  |
| 20    | Johnson & Johnson                     | JNJ    | 17.13      | 10.10    | 0.49  |
| 21    | JPMorgan Chase & Co.                  | JPM    | 15.84      | 15.44    | 0.29  |
| 22    | McDonald's Corporation                | MCD    | 14.05      | 12.05    | 0.30  |
| 23    | Merck & Co., Inc.                     | MRK    | 12.86      | 12.87    | 0.24  |
| 24    | Microsoft Corporation                 | MSFT   | 22.91      | 15.13    | 0.50  |
| 25    | Pfizer Inc.                           | PFE    | 15.34      | 12.92    | 0.32  |
| 26    | The Procter & Gamble Company          | PG     | 15.25      | 11.06    | 0.37  |
| 27    | United Technologies Corporation       | UTX    | 18.93      | 12.37    | 0.47  |
| 28    | Verizon Communications Inc.           | VZ     | 9.93       | 12.38    | 0.14  |
| 29    | Wal-Mart Stores, Inc.                 | WMT    | 14.86      | 13.16    | 0.30  |
| 30    | The Walt Disney Company               | DIS    | 10.08      | 14.05    | 0.13  |

## D.2 Trading periods

| index | period                 | index | period                 |
|-------|------------------------|-------|------------------------|
| 1     | 12/14/1992 – 3/31/1993 | 2     | 4/1/1993 – 7/19/1993   |
| 3     | 7/20/1993 – 11/2/1993  | 4     | 11/3/1993 – 2/17/1994  |
| 5     | 2/18/1994 – 6/8/1994   | 6     | 6/9/1994 – 9/23/1994   |
| 7     | 9/26/1994 – 1/11/1995  | 8     | 1/12/1995 – 4/28/1995  |
| 9     | 5/1/1995 – 8/15/1995   | 10    | 8/16/1995 – 11/30/1995 |
| 11    | 12/1/1995 – 3/19/1996  | 12    | 3/20/1996 – 7/5/1996   |
| 13    | 7/8/1996 – 10/21/1996  | 14    | 10/22/1996 – 2/6/1997  |
| 15    | 2/7/1997 – 5/27/1997   | 16    | 5/28/1997 – 9/11/1997  |
| 17    | 9/12/1997 – 2/29/1998  | 18    | 12/30/1997 – 4/17/1998 |
| 19    | 4/20/1998 – 8/4/1998   | 20    | 8/5/1998 – 11/18/1998  |
| 21    | 11/19/1998 – 3/10/1999 | 22    | 3/11/1999 – 6/25/1999  |
| 23    | 6/28/1999 – 10/12/1999 | 24    | 10/13/1999 – 1/28/2000 |
| 25    | 1/31/2000 – 5/16/2000  | 26    | 5/17/2000 – 8/31/2000  |
| 27    | 9/1/2000 – 12/18/2000  | 28    | 12/19/2000 – 4/6/2001  |
| 29    | 4/9/2001 – 7/25/2001   | 30    | 7/26/2001 – 11/14/2001 |
| 31    | 11/15/2001 – 3/6/2002  | 32    | 3/7/2002 – 6/21/2002   |
| 33    | 6/24/2002 – 10/8/2002  | 34    | 10/9/2002 – 1/27/2003  |
| 35    | 1/28/2003 – 5/14/2003  | 36    | 5/15/2003 – 8/29/2003  |
| 37    | 9/2/2003 – 12/16/2003  | 38    | 12/17/2003 – 4/5/2004  |
| 39    | 4/6/2004 – 7/23/2004   | 40    | 7/26/2004 – 11/8/2004  |
| 41    | 11/9/2004 – 2/25/2005  | 42    | 2/28/2005 – 6/14/2005  |
| 43    | 6/15/2005 – 9/29/2005  | 44    | 9/30/2005 – 1/18/2006  |
| 45    | 1/19/2006 – 5/5/2006   | 46    | 5/8/2006 – 8/22/2006   |
| 47    | 8/23/2006 – 12/7/2006  | 48    | 12/8/2006 – 3/29/2007  |
| 49    | 3/30/2007 – 7/17/2007  | 50    | 7/18/2007 – 10/31/2007 |
| 51    | 11/1/2007 – 2/20/2008  | 52    | 2/21/2008 – 6/6/2008   |

## D.3 Performance metrics

We use the following quantities in assessing the performance of the MVR strategies.

- *Realized return.* The realized return of a portfolio rebalancing strategy over the entire trading period is computed as

$$r_p = \frac{1}{K} \sum_{j=1}^K \frac{1}{L} \sum_{t=N_{\text{estim}}+1+(j-1)L}^{N_{\text{estim}}+jL} r^{(t)T} w^{(j)}.$$

- *Realized risk.* The realized risk (return standard deviation) of a portfolio rebalancing strategy over the entire trading period is computed as

$$\sigma_p = \sqrt{\frac{1}{K} \sum_{j=1}^K \frac{1}{L} \sum_{t=N_{\text{estim}}+1+(j-1)L}^{N_{\text{estim}}+jL} (r^{(t)T} w^{(j)})^2 - r_p^2}.$$

- *Realized Sharpe ratio (SR).* The realized Sharpe ratio, *i.e.*, the ratio of the excess expected return of a portfolio rebalancing strategy relative to the risk-free return  $r_f$  is given by

$$SR = \frac{r_p - r_f}{\sigma_p}.$$

- *Turnover.* The turnover from the portfolio  $w^{(j)}$  held at the start date of the  $j$ th holding period  $[N_{\text{estim}} + 1 + (j - 1)L, N_{\text{estim}} + jL]$  to the portfolio  $w^{(j-1)}$  held at the previous period is computed as

$$\text{TO}(j) = \sum_{i=1}^p \left| w_i^{(j)} - \left( \prod_{t=N_{\text{estim}}+1+(j-1)L}^{N_{\text{estim}}+jL} r_i^{(t)} \right) w_i^{(j-1)} \right|.$$

For the first period, we take  $w^{(0)} = 0$ , *i.e.*, the initial holdings of the assets are zero.

- *Normalized wealth growth.* Let  $w^{(j)} = (w_1^{(j)}, \dots, w_n^{(j)})$  be the portfolio constructed by a rebalancing strategy held over the  $j$ th holding period  $[N_{\text{estim}} + 1 + (j - 1)L, N_{\text{estim}} + jL]$ . When the initial budget is normalized to one, the normalized wealth grows according to the recursion

$$W(t) = \begin{cases} W(t-1)(1 + \sum_{i=1}^p w_{it} r_i^{(t)}), & t \notin \{N_{\text{estim}} + jL \mid j = 1, \dots, K\}, \\ W(t-1)(1 + \sum_{i=1}^p w_{it} r_i^{(t)}) - \text{TC}(j), & t = N_{\text{estim}} + jL, \end{cases}$$

for  $t = N_{\text{estim}}, \dots, N_{\text{estim}} + KL$ , with the initial wealth  $W(N_{\text{estim}}) = 1$ . Here

$$w_{it} = \begin{cases} w_i^{(1)}, & t = N_{\text{estim}} + 1, \dots, N_{\text{estim}} + L, \\ \vdots \\ w_i^{(K)}, & t = N_{\text{estim}} + 1 + (K - 1)L, \dots, N_{\text{estim}} + KL. \end{cases}$$

and

$$\text{TC}(j) = \sum_{i=1}^p \eta_i \left| w_i^{(j)} - \left( \prod_{t=N_{\text{estim}}+1+(j-1)L}^{N_{\text{estim}}+jL} r_i^{(t)} \right) w_i^{(j-1)} \right|$$

is the transaction cost due to the rebalancing if the cost to buy or sell one share of stock  $i$  is  $\eta_i$ .

- *Size of the short side.* The size of the short side of a portfolio rebalancing strategy over the entire trading period is computed as

$$r_p = \frac{1}{K} \sum_{j=1}^K \left( \sum_{i=1}^p |\min(w_i^{(j)}, 0)| / \sum_{i=1}^p |w_i^{(j)}| \right).$$

## D.4 Minimum variance portfolio theoretic performance metrics

Realized utility, realized return, and realized risk based on different regularization schemes for covariance matrices are reported. **sample**=sample covariance matrix, **LW**=linear shrinkage (Ledoit and

Wolf, 2004), **Warton**=linear shrinkage (Warton, 2008), **condreg**=condition number regularization.

Each entry is the mean (standard deviation) of the corresponding metric over the trading period (48 holding periods) from February 1994 through June 2008. The standard deviations are computed in a heteroskedasticity-and-autocorrelation consistent manner discussed by Ledoit and Wolf (2008, Sec. 3.1.). For comparison, the performance metrics of the S&P 500 index for the same period are reported at the end of the table. All values are annualized.

| covariance regularization scheme | return [%]      | risk [%]                | SR          |
|----------------------------------|-----------------|-------------------------|-------------|
|                                  |                 | $N_{\text{estim}} = 15$ |             |
| sample                           | –               | –                       | –           |
| LW                               | 12.12 (3.69)    | 14.38 (0.69)            | 0.50 (0.26) |
| Warton                           | 12.21 (3.71)    | 14.28 (0.68)            | 0.50 (0.26) |
| condreg                          | 14.49 (4.01)    | 16.07 (0.94)            | 0.59 (0.25) |
| condreg - LW                     | 2.37 (5.45)     | 1.69 (1.17)             | 0.10 (0.36) |
| condreg - Warton                 | 2.28 (5.47)     | 1.79 (1.16)             | 0.09 (0.37) |
|                                  |                 | $N_{\text{estim}} = 30$ |             |
| sample                           | 145.91 (114.74) | 851.07 (257.28)         | 0.17 (0.14) |
| LW                               | 11.82 (3.72)    | 14.27 (0.65)            | 0.48 (0.26) |
| Warton                           | 12.1 (3.68)     | 14.06 (0.69)            | 0.51 (0.27) |
| condreg                          | 14.32 (4.00)    | 15.92 (0.91)            | 0.59 (0.26) |
| condreg - LW                     | 2.51 (5.46)     | 1.65 (1.12)             | 0.11 (0.37) |
| condreg - Warton                 | 2.16 (5.43)     | 1.85 (1.14)             | 0.08 (0.37) |
|                                  |                 | $N_{\text{estim}} = 45$ |             |
| sample                           | 9.52 (5.62)     | 21.15 (0.74)            | 0.21 (0.26) |
| LW                               | 12.21 (3.65)    | 14.04 (0.72)            | 0.51 (0.26) |
| Warton                           | 12.62 (3.60)    | 13.85 (0.76)            | 0.55 (0.26) |
| condreg                          | 14.53 (3.93)    | 15.63 (0.87)            | 0.61 (0.26) |
| condreg - LW                     | 2.33 (5.36)     | 1.60 (1.13)             | 0.10 (0.37) |
| condreg - Warton                 | 1.91 (5.33)     | 1.79 (1.16)             | 0.06 (0.37) |
|                                  |                 | $N_{\text{estim}} = 60$ |             |
| sample                           | 9.32 (4.29)     | 17.52 (0.70)            | 0.25 (0.25) |
| LW                               | 11.55 (3.55)    | 13.94 (0.74)            | 0.47 (0.26) |
| Warton                           | 12.15 (3.55)    | 13.78 (0.77)            | 0.52 (0.26) |
| condreg                          | 14.13 (3.91)    | 15.65 (0.90)            | 0.58 (0.25) |
| condreg - LW                     | 2.58 (5.28)     | 1.71 (1.17)             | 0.11 (0.36) |
| condreg - Warton                 | 1.98 (5.28)     | 1.87 (1.18)             | 0.06 (0.37) |
|                                  |                 | S&P500                  |             |
| –                                | 8.71 (3.84)     | 16.04 (0.94)            | 0.23 (0.24) |

## D.5 Turnover

Turnover for various estimation horizon sizes over the trading period from February 18, 1994 through June 6, 2008. **sample**=sample covariance matrix, **LW**=linear shrinkage (Ledoit and Wolf, 2004), **Warton**=linear shrinkage (Warton, 2008), **condreg**=condition number regularization.

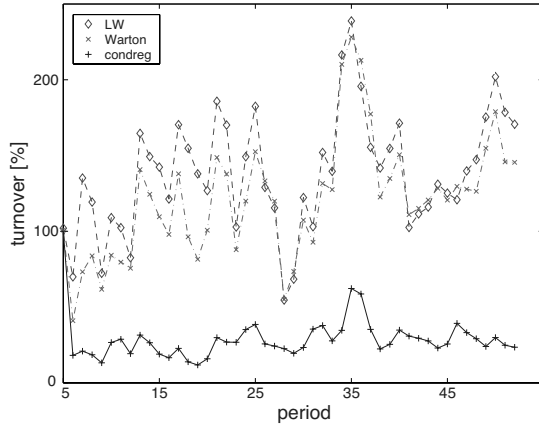

(a)  $N_{\text{estim}} = 15$

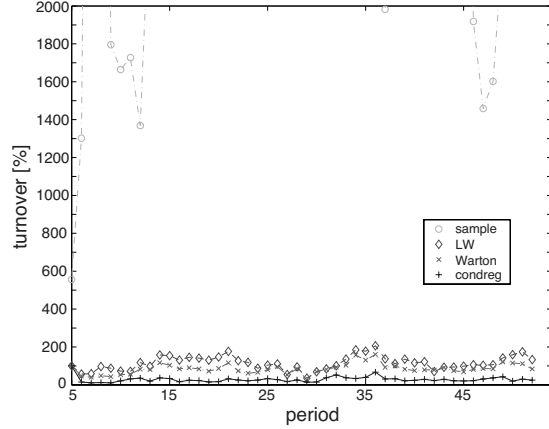

(b)  $N_{\text{estim}} = 30$

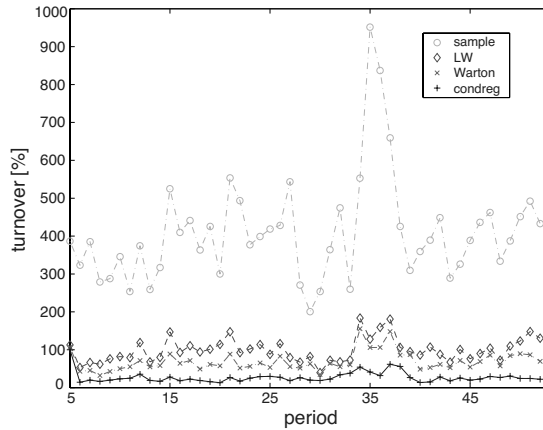

(c)  $N_{\text{estim}} = 45$

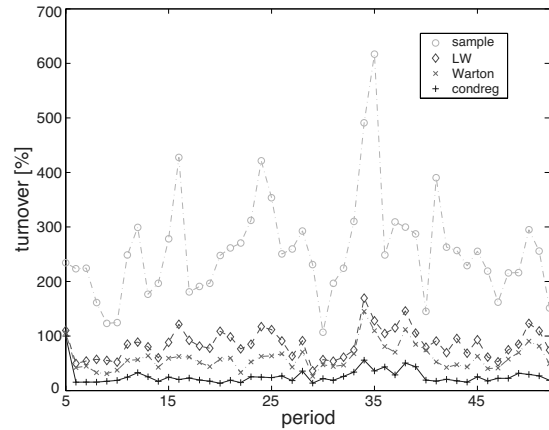

(d)  $N_{\text{estim}} = 60$

## D.6 Size of the short side

The size of the short side of the portfolios based on different regularization schemes for covariance matrices are reported. `sample`=sample covariance matrix, `LW`=linear shrinkage (Ledoit and Wolf, 2004), `Warton`=linear shrinkage (Warton, 2008), `condreg`=condition number regularization.

Each entry is the mean (standard deviation) of the short-side size over the trading period (48 holding periods) from February 1994 through June 2008, given in percent.

| covariance<br>regularization scheme | $N_{\text{estim}}$ |              |              |              |
|-------------------------------------|--------------------|--------------|--------------|--------------|
|                                     | 15                 | 30           | 45           | 60           |
| <code>sample</code>                 | –                  | 47.47 (1.86) | 36.84 (3.21) | 32.83 (4.47) |
| <code>LW</code>                     | 13.05 (7.68)       | 15.87 (7.63) | 17.29 (7.35) | 17.79 (7.36) |
| <code>Warton</code>                 | 10.68 (7.62)       | 11.01 (6.91) | 11.14 (7.09) | 11.53 (0.73) |
| <code>condreg</code>                | 0.08 (0.54)        | 0.27 (0.94)  | 0.61 (1.88)  | 0.96 (2.81)  |

## References

Geman, S. (1980). A limit theorem for the norm of random matrices. *The Annals of Probability* 8(2), 252–261.

- Ledoit, O. and M. Wolf (2004). A well-conditioned estimator for large-dimensional covariance matrices. *Journal of Multivariate Analysis* 88, 365–411.
- Ledoit, O. and M. Wolf (2008, December). Robust performance hypothesis testing with the sharpe ratio. *Journal of Empirical Finance* 15(5), 850–859.
- Silverstein, J. W. (1985). The smallest eigenvalue of a large dimensional wishart matrix. *The Annals of Probability* 13(4), 1364–1368.
- Warton, D. I. (2008). Penalized Normal Likelihood and Ridge Regularization of Correlation and Covariance Matrices. *Journal of the American Statistical Association* 103(481), 340–349.
- Yang, R. and J. O. Berger (1994). Estimation of a covariance matrix using the reference prior. *The Annals of Statistics* 22(3), 1195–1211.
